# Supplementary material for: A Panel of Synapse-Related Genes as a Biomarker for Gliomas
Source: Front Neurosci. 2020 Aug 11;14:822. doi: 10.3389/fnins.2020.00822 (PMC7431624; doi:10.3389/fnins.2020.00822)
Supplement: Supplementary file 5 [file Data_Sheet_3.XLSX]

## Sheet: Sheet1
Supplementary File S3: The prognostic performances of gene sets with different sizes. The best-performed 17-gene set is marked in bold.
gene_set	lnHR_1	p_1	FDR_1	lnHR_2	p_2	FDR_2	combined_FDR
set17	-9.76069	1.79835e-32	3.70408e-31	-8.01218	2.05901e-34	1.93751e-32	7.1767e-63
set16	-9.88494	9.2695e-33	3.70408e-31	-8.18129	8.11e-34	3.8928e-32	1.44192e-62
set18	-9.45879	2.86546e-32	3.70408e-31	-7.46375	2.2707e-32	6.53961e-31	2.42232e-61
set9	-6.8233	7.40257e-30	2.42266e-29	-6.50559	2.69099e-34	1.93751e-32	4.69393e-61
set15	-9.84806	3.51771e-32	3.70408e-31	-8.08604	1.04346e-31	1.87823e-30	6.9571e-61
set19	-9.18033	8.98003e-32	5.62228e-31	-7.08637	3.03033e-31	4.84853e-30	2.72598e-60
set12	-7.84632	6.7524e-32	4.67516e-31	-6.55942	8.2136e-31	1.15279e-29	5.38947e-60
set14	-9.73343	7.38538e-32	4.83407e-31	-7.90019	8.80602e-31	1.15279e-29	5.57266e-60
set13	-9.69711	2.88101e-32	3.70408e-31	-7.90713	1.5669e-30	1.88028e-29	6.96471e-60
set11	-7.19682	1.7748e-30	7.51681e-30	-6.45132	4.57385e-32	1.09772e-30	8.25138e-60
set20	-9.34911	4.84694e-32	4.53863e-31	-7.01506	2.83488e-30	2.91587e-29	1.32341e-59
set8	-6.68683	3.24972e-30	1.26475e-29	-5.76803	7.09658e-32	1.45987e-30	1.84637e-59
set10	-6.74506	9.65108e-30	2.95693e-29	-6.14994	1.7457e-32	6.28453e-31	1.85829e-59
set21	-8.69935	2.59426e-31	1.33419e-30	-6.56933	2.75047e-29	2.47542e-28	3.30268e-58
set7	-6.64887	6.47722e-30	2.16912e-29	-5.45034	1.71024e-30	1.89442e-29	4.10921e-58
set23	-9.55698	5.67329e-32	4.53863e-31	-6.92996	1.96966e-28	1.57573e-27	7.15166e-58
set27	-10.0117	2.20812e-32	3.70408e-31	-7.18358	7.69064e-28	5.27358e-27	1.95338e-57
set24	-9.25183	1.04156e-31	6.24938e-31	-6.75549	5.21749e-28	3.7566e-27	2.34764e-57
set25	-9.31779	1.45445e-32	3.70408e-31	-6.63911	9.83961e-28	6.44047e-27	2.3856e-57
set22	-9.31764	3.46883e-31	1.72246e-30	-6.81045	2.79895e-28	2.12131e-27	3.65386e-57
set26	-9.78368	3.24753e-32	3.70408e-31	-6.98292	1.60924e-27	1.00752e-26	3.73194e-57
set28	-9.97844	3.60119e-32	3.70408e-31	-7.16224	2.041e-27	1.2246e-26	4.53602e-57
set5	-6.53704	7.81428e-30	2.50057e-29	-5.22747	2.97924e-29	2.52359e-28	6.31041e-57
set29	-9.73724	3.47294e-32	3.70408e-31	-6.92478	3.92951e-27	2.2634e-26	8.3838e-57
set34	-10.467	6.81794e-32	4.67516e-31	-7.54825	4.32599e-27	2.39593e-26	1.12014e-56
set6	-6.4791	1.61549e-29	4.84648e-29	-5.18333	2.49153e-29	2.39187e-28	1.15922e-56
set35	-10.4138	6.10489e-32	4.62686e-31	-7.55507	6.0782e-27	3.24171e-26	1.49989e-56
set32	-10.336	2.55099e-32	3.70408e-31	-7.32111	1.13447e-26	5.1061e-26	1.89134e-56
set33	-10.611	3.51613e-32	3.70408e-31	-7.55551	1.40286e-26	6.12155e-26	2.26747e-56
set30	-9.71546	2.91227e-32	3.70408e-31	-6.77875	4.49507e-26	1.51056e-25	5.59523e-56
set36	-10.8482	5.5702e-32	4.53863e-31	-7.734	4.63339e-26	1.51638e-25	6.8823e-56
set31	-9.7822	3.06999e-32	3.70408e-31	-6.84358	7.26007e-26	2.17802e-25	8.06756e-56
set37	-11.2542	5.56286e-32	4.53863e-31	-7.97032	1.44466e-25	3.85241e-25	1.74847e-55
set4	-7.35785	4.77924e-31	2.29404e-30	-5.31257	7.56167e-26	2.2222e-25	5.09782e-55
set38	-11.062	1.5374e-31	8.85541e-31	-7.7541	5.71474e-25	1.30623e-24	1.15672e-54
set49	-11.1079	4.21547e-30	1.51757e-29	-8.40598	2.25836e-26	8.79837e-26	1.33521e-54
set50	-11.0153	4.88571e-30	1.71596e-29	-8.4534	2.41651e-26	9.1573e-26	1.57135e-54
set51	-10.8862	8.30757e-30	2.60063e-29	-8.37389	2.48475e-26	9.17447e-26	2.38594e-54
set39	-11.3363	2.29931e-31	1.2263e-30	-7.93563	8.97288e-25	1.95772e-24	2.40075e-54
set40	-11.7716	2.17345e-31	1.20376e-30	-8.22695	9.93434e-25	2.10374e-24	2.5324e-54
set44	-11.3629	2.70528e-30	1.11303e-29	-8.31951	8.45674e-26	2.38779e-25	2.65767e-54
set62	-10.6398	3.07798e-29	8.05871e-29	-8.33176	6.60296e-27	3.39581e-26	2.73658e-54
set41	-12.0202	5.01935e-31	2.33157e-30	-8.5593	5.61019e-25	1.30301e-24	3.03806e-54
set53	-10.5304	2.76646e-29	7.51641e-29	-8.18375	9.88855e-27	4.7465e-26	3.56766e-54
set61	-10.5927	3.25966e-29	8.38199e-29	-8.26906	9.40783e-27	4.67148e-26	3.91563e-54
set63	-10.6078	2.94939e-29	7.86505e-29	-8.30608	1.13469e-26	5.1061e-26	4.01598e-54
set47	-11.1513	3.58383e-30	1.35808e-29	-8.26524	1.35462e-25	3.68048e-25	4.9984e-54
set52	-10.7434	1.97918e-29	5.70004e-29	-8.31685	2.26069e-26	8.79837e-26	5.0151e-54
set64	-10.7045	3.68087e-29	9.13872e-29	-8.40587	1.62153e-26	6.86767e-26	6.27617e-54
set46	-11.3271	3.7796e-30	1.39555e-29	-8.25436	1.883e-25	4.75705e-25	6.63868e-54
set65	-10.7088	3.67754e-29	9.13872e-29	-8.42176	1.78692e-26	7.35189e-26	6.71869e-54
set43	-11.4996	1.57876e-30	6.88915e-30	-8.33887	4.6051e-25	1.10522e-24	7.61405e-54
set59	-10.5231	2.617e-29	7.24708e-29	-8.06579	2.92265e-26	1.05216e-25	7.62506e-54
set60	-10.5602	2.49629e-29	7.04835e-29	-8.10849	3.22636e-26	1.13316e-25	7.98692e-54
set48	-11.1108	2.93952e-30	1.17581e-29	-8.21314	3.00435e-25	7.33266e-25	8.62179e-54
set58	-10.4686	1.95996e-29	5.70004e-29	-7.99751	7.01234e-26	2.14846e-25	1.22463e-53
set45	-11.187	5.28292e-30	1.81129e-29	-8.12068	2.84992e-25	7.07565e-25	1.2816e-53
set57	-10.5252	3.87752e-29	9.46379e-29	-8.06106	8.354e-26	2.38779e-25	2.25975e-53
set42	-11.7448	7.29376e-31	3.28219e-30	-8.31955	4.70109e-24	7.78111e-24	2.55391e-53
set55	-10.3669	8.00395e-29	1.85898e-28	-8.02002	4.5107e-26	1.51056e-25	2.8081e-53
set56	-10.4009	7.72859e-29	1.82445e-28	-8.05129	4.83877e-26	1.54841e-25	2.825e-53
set54	-10.3051	6.55208e-29	1.5725e-28	-7.9612	6.02119e-26	1.88489e-25	2.96399e-53
set67	-10.5947	1.11151e-28	2.54059e-28	-8.3377	1.06697e-25	2.95469e-25	7.50666e-53
set66	-10.598	1.16855e-28	2.62923e-28	-8.26562	1.75487e-25	4.51251e-25	1.18645e-52
set68	-10.4607	1.76413e-28	3.90823e-28	-8.24135	1.54636e-25	4.04865e-25	1.58231e-52
set69	-10.5297	2.12472e-28	4.49941e-28	-8.19681	4.78872e-25	1.13045e-24	5.08637e-52
set70	-10.613	2.06091e-28	4.46349e-28	-8.21904	5.81284e-25	1.30789e-24	5.83775e-52
set71	-10.6817	2.07676e-28	4.46349e-28	-8.27102	6.35115e-25	1.40702e-24	6.28024e-52
set72	-10.5195	3.56678e-28	7.13357e-28	-8.13083	9.32231e-25	2.0036e-24	1.42928e-51
set75	-10.8234	3.30718e-28	6.80334e-28	-8.29772	1.98247e-24	3.65995e-24	2.48999e-51
set73	-10.6294	3.21958e-28	6.71913e-28	-8.15619	2.1117e-24	3.82588e-24	2.57066e-51
set74	-10.5723	3.53073e-28	7.13357e-28	-8.10737	2.12549e-24	3.82588e-24	2.72921e-51
set78	-10.832	1.20441e-27	2.30372e-27	-8.46211	1.46641e-24	2.97413e-24	6.85156e-51
set79	-10.8239	1.15045e-27	2.23871e-27	-8.44337	1.59588e-24	3.10047e-24	6.94106e-51
set80	-11.0057	1.2197e-27	2.30372e-27	-8.60682	1.71317e-24	3.24601e-24	7.47788e-51
set83	-10.7697	2.7514e-27	4.89138e-27	-8.47511	1.22395e-24	2.51785e-24	1.23158e-50
set86	-10.5786	3.17819e-27	5.58121e-27	-8.3549	1.54687e-24	3.07557e-24	1.71654e-50
set84	-10.6192	4.8514e-27	8.21885e-27	-8.39295	1.16273e-24	2.42657e-24	1.99436e-50
set76	-10.8405	8.15922e-28	1.60949e-27	-8.25364	9.15234e-24	1.43254e-23	2.30566e-50
set82	-11.01	1.64729e-27	3.04114e-27	-8.55752	5.13439e-24	8.30932e-24	2.52698e-50
set81	-10.9586	1.73043e-27	3.1542e-27	-8.47853	5.13562e-24	8.30932e-24	2.62093e-50
set87	-10.5153	4.52453e-27	7.75633e-27	-8.28609	1.89582e-24	3.54543e-24	2.74995e-50
set88	-10.3374	5.52063e-27	9.1376e-27	-8.17076	1.55914e-24	3.07557e-24	2.81033e-50
set85	-10.577	6.57949e-27	1.05272e-26	-8.363	1.61483e-24	3.10047e-24	3.26392e-50
set77	-10.8791	1.23185e-27	2.30372e-27	-8.30047	9.34342e-24	1.44672e-23	3.33284e-50
set89	-10.4066	4.28697e-27	7.43763e-27	-8.12443	2.66074e-24	4.61623e-24	3.43338e-50
set93	-10.6392	6.78437e-27	1.07357e-26	-8.3776	2.23895e-24	3.98035e-24	4.27319e-50
set92	-10.5456	6.17657e-27	9.99355e-27	-8.28548	2.47995e-24	4.35503e-24	4.35222e-50
set91	-10.5034	5.11122e-27	8.55831e-27	-8.21861	3.006e-24	5.15314e-24	4.41022e-50
set94	-10.6418	7.05383e-27	1.08059e-26	-8.34222	3.27885e-24	5.55476e-24	6.0024e-50
set90	-10.4198	5.62782e-27	9.20916e-27	-8.12032	3.95827e-24	6.62781e-24	6.10365e-50
set95	-10.7993	6.90211e-27	1.07521e-26	-8.40809	5.98838e-24	9.58141e-24	1.0302e-49
set96	-10.7144	6.94404e-27	1.07521e-26	-8.38382	6.93311e-24	1.09711e-23	1.17962e-49
set97	-10.701	8.84948e-27	1.34139e-26	-8.35235	1.04558e-23	1.60175e-23	2.14857e-49
set98	-10.6636	1.20282e-26	1.76741e-26	-8.2939	1.29245e-23	1.95908e-23	3.46251e-49
set99	-10.6389	9.39409e-27	1.40911e-26	-8.2535	2.0736e-23	3.11041e-23	4.38292e-49
set100	-10.676	1.01293e-26	1.50373e-26	-8.26653	2.22392e-23	3.30148e-23	4.96454e-49
set101	-10.659	1.26287e-26	1.83119e-26	-8.22711	3.37136e-23	4.95383e-23	9.07141e-49
set102	-10.7338	1.27166e-26	1.83119e-26	-8.20959	4.86597e-23	7.07777e-23	1.29607e-48
set103	-10.5296	2.07828e-26	2.82332e-26	-8.06789	6.07329e-23	8.74554e-23	2.46914e-48
set3	-9.60576	2.13573e-27	3.84431e-27	-6.98623	6.05811e-22	8.30827e-22	3.19395e-48
set106	-10.7146	1.5518e-26	2.1695e-26	-8.15164	1.06929e-22	1.52453e-22	3.30747e-48
set105	-10.6528	1.52454e-26	2.1523e-26	-8.10899	1.09914e-22	1.55173e-22	3.33977e-48
set104	-10.5284	1.69575e-26	2.34797e-26	-7.99788	1.25351e-22	1.75248e-22	4.11476e-48
set107	-10.804	1.49539e-26	2.13204e-26	-8.12886	2.66761e-22	3.69361e-22	7.87493e-48
set108	-10.8423	1.72165e-26	2.36112e-26	-8.01979	1.1998e-21	1.62992e-21	3.84843e-47
set109	-10.6525	4.17868e-26	5.62365e-26	-7.87194	2.33623e-21	3.14409e-21	1.76812e-46
set111	-10.6825	6.074e-26	7.9595e-26	-7.88034	2.98724e-21	3.98299e-21	3.17026e-46
set110	-10.6704	5.30733e-26	7.07644e-26	-7.84148	3.61132e-21	4.77092e-21	3.37612e-46
set112	-10.8023	7.04873e-26	8.94545e-26	-7.95849	3.82e-21	5.00073e-21	4.47338e-46
set115	-10.8262	6.35502e-26	8.24435e-26	-8.01195	4.3916e-21	5.69721e-21	4.69698e-46
set114	-10.822	8.42549e-26	9.94484e-26	-7.97862	4.6117e-21	5.92932e-21	5.89662e-46
set113	-10.8603	8.3545e-26	9.94254e-26	-7.98101	5.34725e-21	6.81419e-21	6.77504e-46
set116	-10.8912	8.09669e-26	9.79767e-26	-8.05984	7.5977e-21	9.59709e-21	9.40292e-46
set118	-11.0972	7.8225e-26	9.71069e-26	-8.16996	1.03058e-20	1.27934e-20	1.24232e-45
set117	-10.9499	8.02519e-26	9.79346e-26	-8.06725	1.06082e-20	1.29456e-20	1.26782e-45
set123	-11.4487	8.26553e-26	9.91863e-26	-8.39113	1.12332e-20	1.35931e-20	1.34825e-45
set121	-11.2565	1.07989e-25	1.24404e-25	-8.2598	9.23723e-21	1.15666e-20	1.43893e-45
set119	-11.191	7.76686e-26	9.71069e-26	-8.19672	1.30545e-20	1.56654e-20	1.52122e-45
set122	-11.3479	1.07411e-25	1.24404e-25	-8.31279	1.04366e-20	1.2845e-20	1.59797e-45
set124	-11.575	7.08182e-26	8.94545e-26	-8.43372	1.52226e-20	1.79676e-20	1.60728e-45
set120	-11.2454	7.89049e-26	9.71137e-26	-8.23514	1.41506e-20	1.68404e-20	1.63543e-45
set125	-11.6122	6.08017e-26	7.9595e-26	-8.37586	2.64748e-20	3.0745e-20	2.44714e-45
set126	-11.7249	6.63716e-26	8.53349e-26	-8.46989	2.6182e-20	3.0652e-20	2.61569e-45
set127	-11.7717	9.21623e-26	1.07897e-25	-8.43439	4.91146e-20	5.65801e-20	6.10483e-45
set128	-11.7543	1.33266e-25	1.52304e-25	-8.45255	5.67261e-20	6.48298e-20	9.87382e-45
set129	-11.8372	1.50488e-25	1.67987e-25	-8.52919	5.99571e-20	6.79828e-20	1.14202e-44
set130	-11.7969	1.34512e-25	1.52518e-25	-8.43248	1.24985e-19	1.40609e-19	2.14453e-44
set131	-11.9377	1.38116e-25	1.55381e-25	-8.44054	1.79231e-19	1.97018e-19	3.06128e-44
set133	-12.1053	2.07252e-25	2.24393e-25	-8.53899	1.49348e-19	1.66714e-19	3.74096e-44
set132	-11.9502	2.18752e-25	2.35077e-25	-8.46143	1.71415e-19	1.89875e-19	4.46353e-44
set134	-12.2214	1.89116e-25	2.06308e-25	-8.54379	2.43399e-19	2.65526e-19	5.47803e-44
set135	-12.3305	1.68041e-25	1.86137e-25	-8.60098	2.87139e-19	3.10888e-19	5.78678e-44
set136	-12.3668	1.76837e-25	1.94385e-25	-8.62069	3.09925e-19	3.33054e-19	6.47408e-44
set137	-12.3602	2.45744e-25	2.62127e-25	-8.62007	3.87186e-19	4.12999e-19	1.08258e-43
set138	-12.3945	2.53251e-25	2.68148e-25	-8.63553	4.47894e-19	4.70779e-19	1.26239e-43
set141	-12.5239	3.44334e-25	3.56721e-25	-8.74018	4.41817e-19	4.67806e-19	1.66876e-43
set140	-12.441	3.42902e-25	3.56721e-25	-8.66483	5.29539e-19	5.48587e-19	1.95692e-43
set142	-12.4512	4.63522e-25	4.70051e-25	-8.71516	4.93062e-19	5.14499e-19	2.41841e-43
set139	-12.4212	3.05872e-25	3.21501e-25	-8.61545	7.43695e-19	7.5417e-19	2.42466e-43
set143	-12.4926	4.58451e-25	4.68205e-25	-8.7307	5.55556e-19	5.71429e-19	2.67546e-43
set144	-12.5644	4.46494e-25	4.59251e-25	-8.73869	5.82561e-19	5.94956e-19	2.73234e-43
set2	-11.6776	1.98992e-22	2.00383e-22	-6.49353	7.17487e-12	7.22505e-12	1.44778e-33
set1	171.398	1.18295e-21	1.18295e-21	69.6872	1.0583e-11	1.0583e-11	1.25192e-32
